# Supplementary material for: Temperature Sensitivity of Topsoil Organic Matter Decomposition Does Not Depend on Vegetation Types in Mountains
Source: MDPI journal article supplement (doi:10.3390/plants11202765), 2022-10-19
Supplement: s1 [file s1]

# Supplementary materials

**Table S1.** Pearson's correlation coefficients between studied properties of long and short mountain transects with different land use ( $n = 33$ ; \* $P \leq 0.01$ , \*\* $0.001$ ).

| Variable        | Q <sub>10</sub> | Altitude | Cover  | Richness | C     | pH    | C:N   | BR:C | MBC:C |
|-----------------|-----------------|----------|--------|----------|-------|-------|-------|------|-------|
| Q <sub>10</sub> | 1.00            |          |        |          |       |       |       |      |       |
| Altitude        | -0.07           | 1.00     |        |          |       |       |       |      |       |
| Cover           | -0.20           | 0.53*    | 1.00   |          |       |       |       |      |       |
| Richness        | -0.38           | 0.28     | 0.58** | 1.00     |       |       |       |      |       |
| C               | 0.12            | 0.68**   | 0.66** | 0.38     | 1.00  |       |       |      |       |
| pH              | 0.45*           | -0.01    | -0.12  | -0.28    | -0.16 | 1.00  |       |      |       |
| C:N             | 0.36            | -0.31    | -0.44  | -0.38    | -0.19 | 0.41  | 1.00  |      |       |
| BR:C            | -0.51*          | -0.19    | 0.09   | 0.09     | -0.17 | -0.14 | 0.03  | 1.00 |       |
| MBC:C           | -0.14           | 0.40     | 0.27   | 0.25     | 0.07  | 0.07  | -0.04 | 0.25 | 1.00  |
